# Supplementary material for: Hydrological Controls on Temporal Contributions of Three Nested Forested Subcatchments to DOC Export
Source: Copernicus journal article supplement (doi:10.5194/hess-2024-250), 2024-08-16
Supplement: Supplementary file 1 [file hess-2024-250-supplement.pdf]

## Supplement of

# Hydrological Controls on Temporal Contributions of Three Nested Forested Subcatchments to DOC Export

Blaurock, Katharina; Beudert, Burkhard; Hopp, Luisa

5 Correspondence to: Luisa Hopp (luisa.hopp@uni-bayreuth.de)

### 1. Gapfilling of missing discharge data

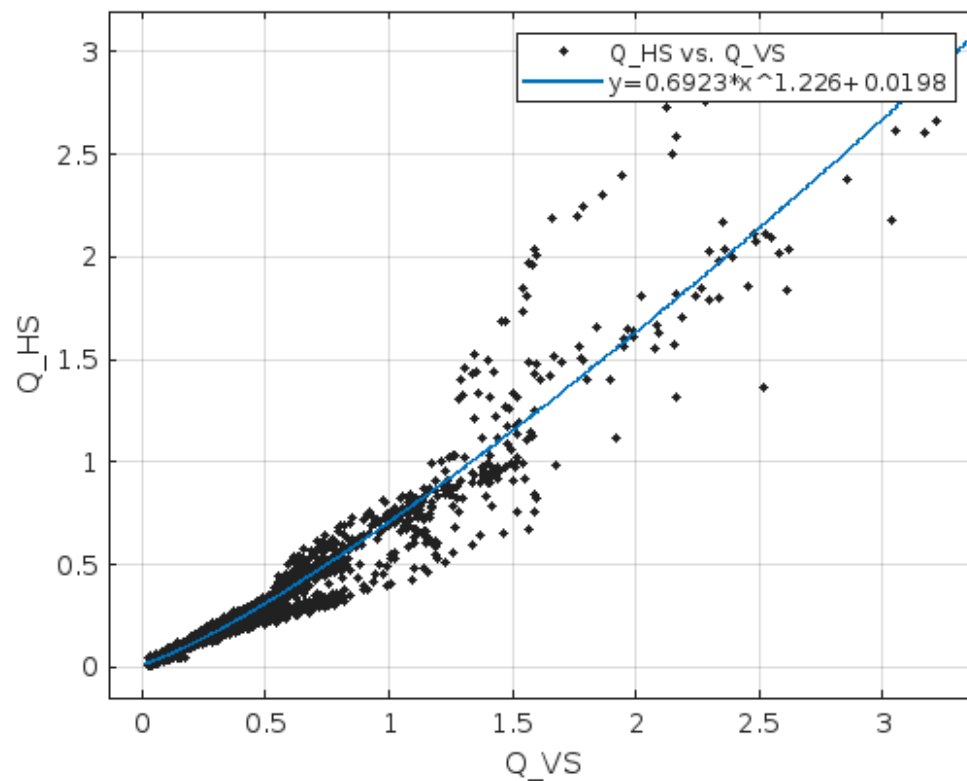

Figure S1: Relationship between the discharge (in  $\text{m}^3 \text{s}^{-1}$ ) of the catchment Vorderer Schachtenbach ( $Q_{VS}$ ) and the catchment Hinterer Schachtenbach ( $Q_{HS}$ ), which was used for the gap filling of missing discharge data at Hinterer Schachtenbach from August 1<sup>st</sup> to September 3<sup>rd</sup>, 2020 ( $R^2 = 0.94$ ).

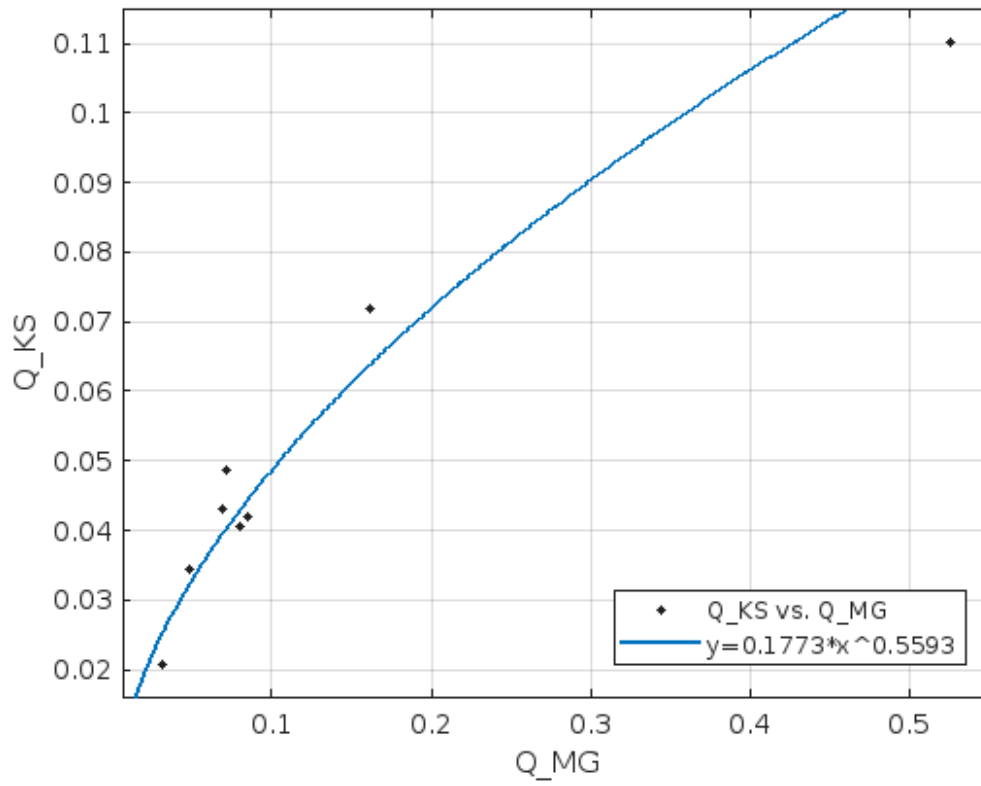

**Figure S2: Relationship of discharge (in  $\text{m}^3 \text{s}^{-1}$ ) at MG ( $Q_{MG}$ ) and KS ( $Q_{KS}$ ), which was measured at KS via tracer dilution on eight occasions ( $R^2 = 0.93$ ).**

2. Correction of DOC concentrations, determined by UV-Vis spectrophotometers, with DOC concentrations measured in grab samples

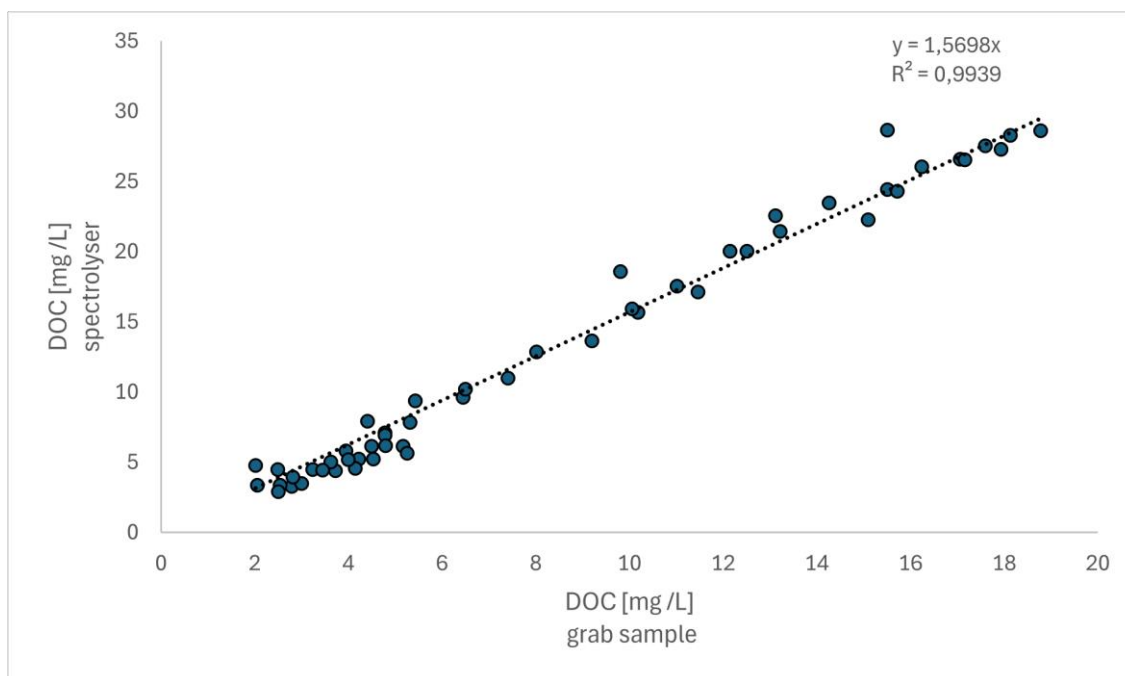

25 Figure S3: Correction factor used for the DOC concentrations measurements made by UV-Vis spectrophotometer D1 using grab stream samples at various discharge conditions (n = 52).

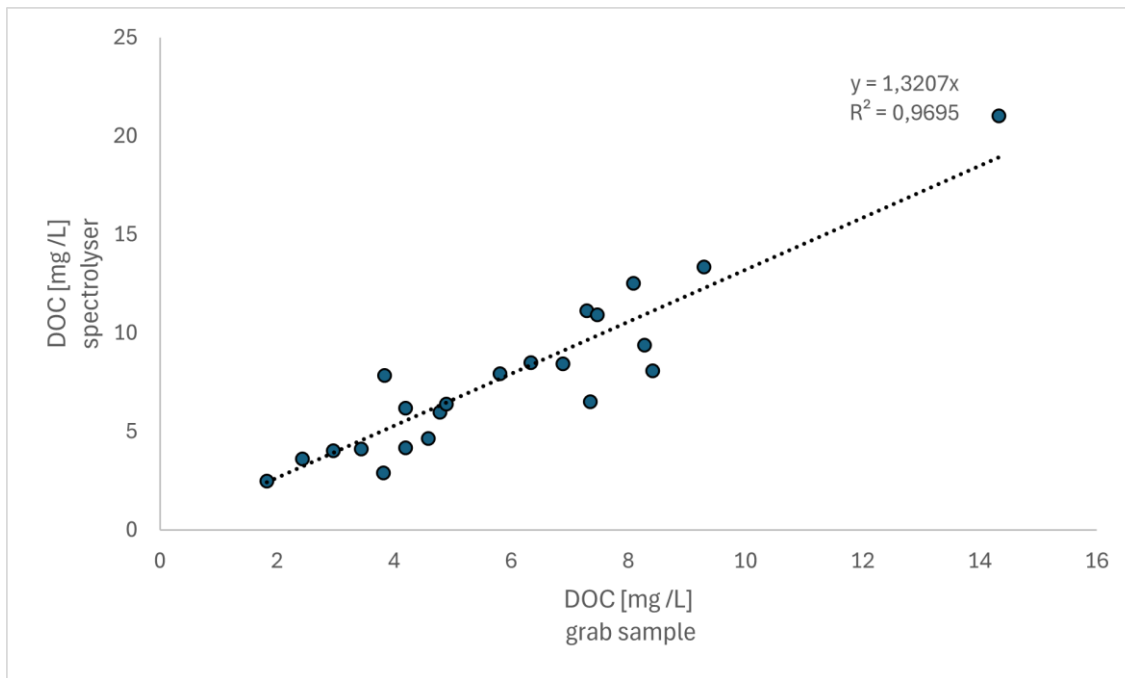

Figure S4: Correction factor used for the DOC concentrations measurements made by UV-Vis spectrophotometer D2 using grab stream samples at various discharge conditions (n = 22).

30

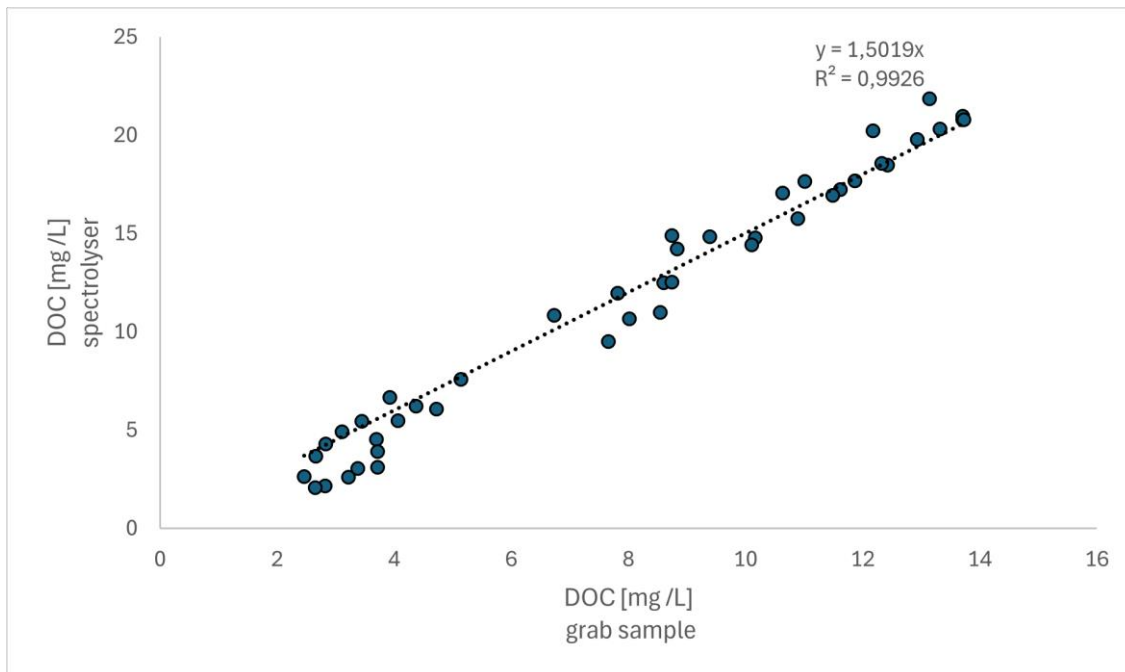

Figure S5: Correction factor used for the DOC concentrations measurements made by UV-Vis spectrophotometer D3 using grab stream samples at various discharge conditions (n =44).

## 3. DOC export from the subcatchments

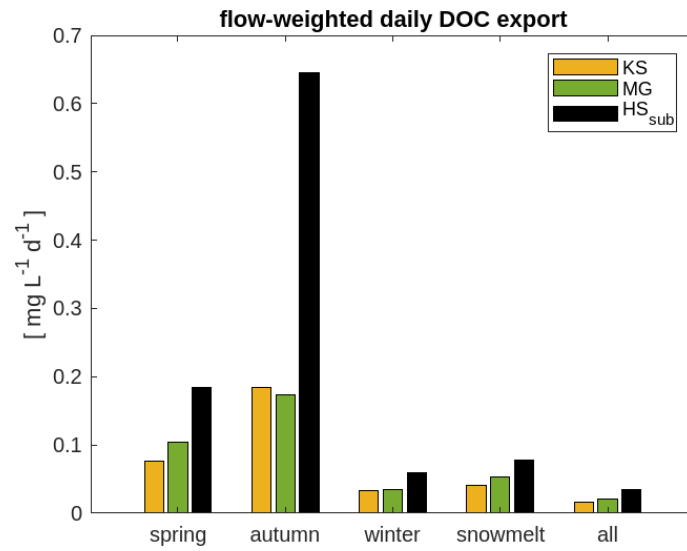

40 **Figure S6: Mean daily flow-weighted DOC export from the subcatchments KS, MG and HS<sub>sub</sub> during the different hydrological periods.**
